# Supplementary material
Source: PubMed Central journal article supplement (PMC6013667)

Supplemental Figure 1

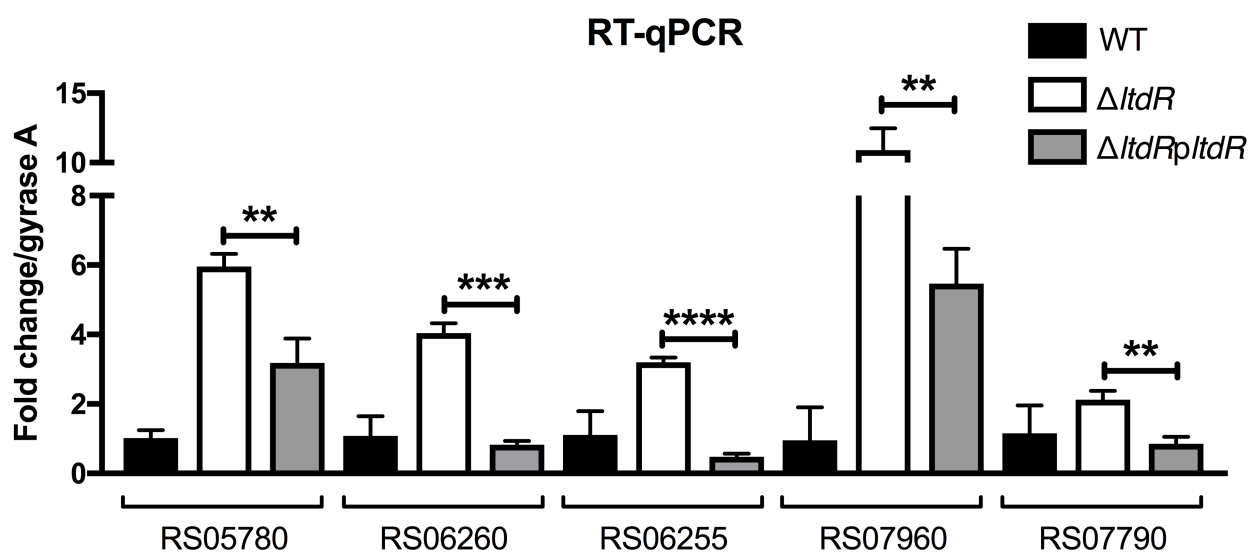

Supplement: IAI.00822-17_zii007182452s3.pdf [file IAI.00822-17_zii007182452s3.pdf]
